# Supplementary material for: Differential Receptor Binding and Regulatory Mechanisms for the Lymphangiogenic Growth Factors Vascular Endothelial Growth Factor (VEGF)-C and -D
Source: PubMed Central journal article supplement (PMC5207153; doi:10.1074/jbc.m116.736801), 2016-11-16
Supplement: 10.1074_M116.736801_jbc.M116.736801-1.pdf [file 10.1074_M116.736801_jbc.M116.736801-1.pdf]

**SUPPLEMENTAL INFORMATION**

Differential Receptor Binding and Regulatory Mechanisms for the Lymphangiogenic Growth Factors  
VEGF-C and VEGF-D

**Natalia Davydova, Nicole C. Harris, Sally Roufail, Sophie Paquet-Fifield, Musarat Ishaq, Victor A. Streltsov, Steven P. Williams, Tara Karnezis, Steven A. Stacker and Marc G. Achen**

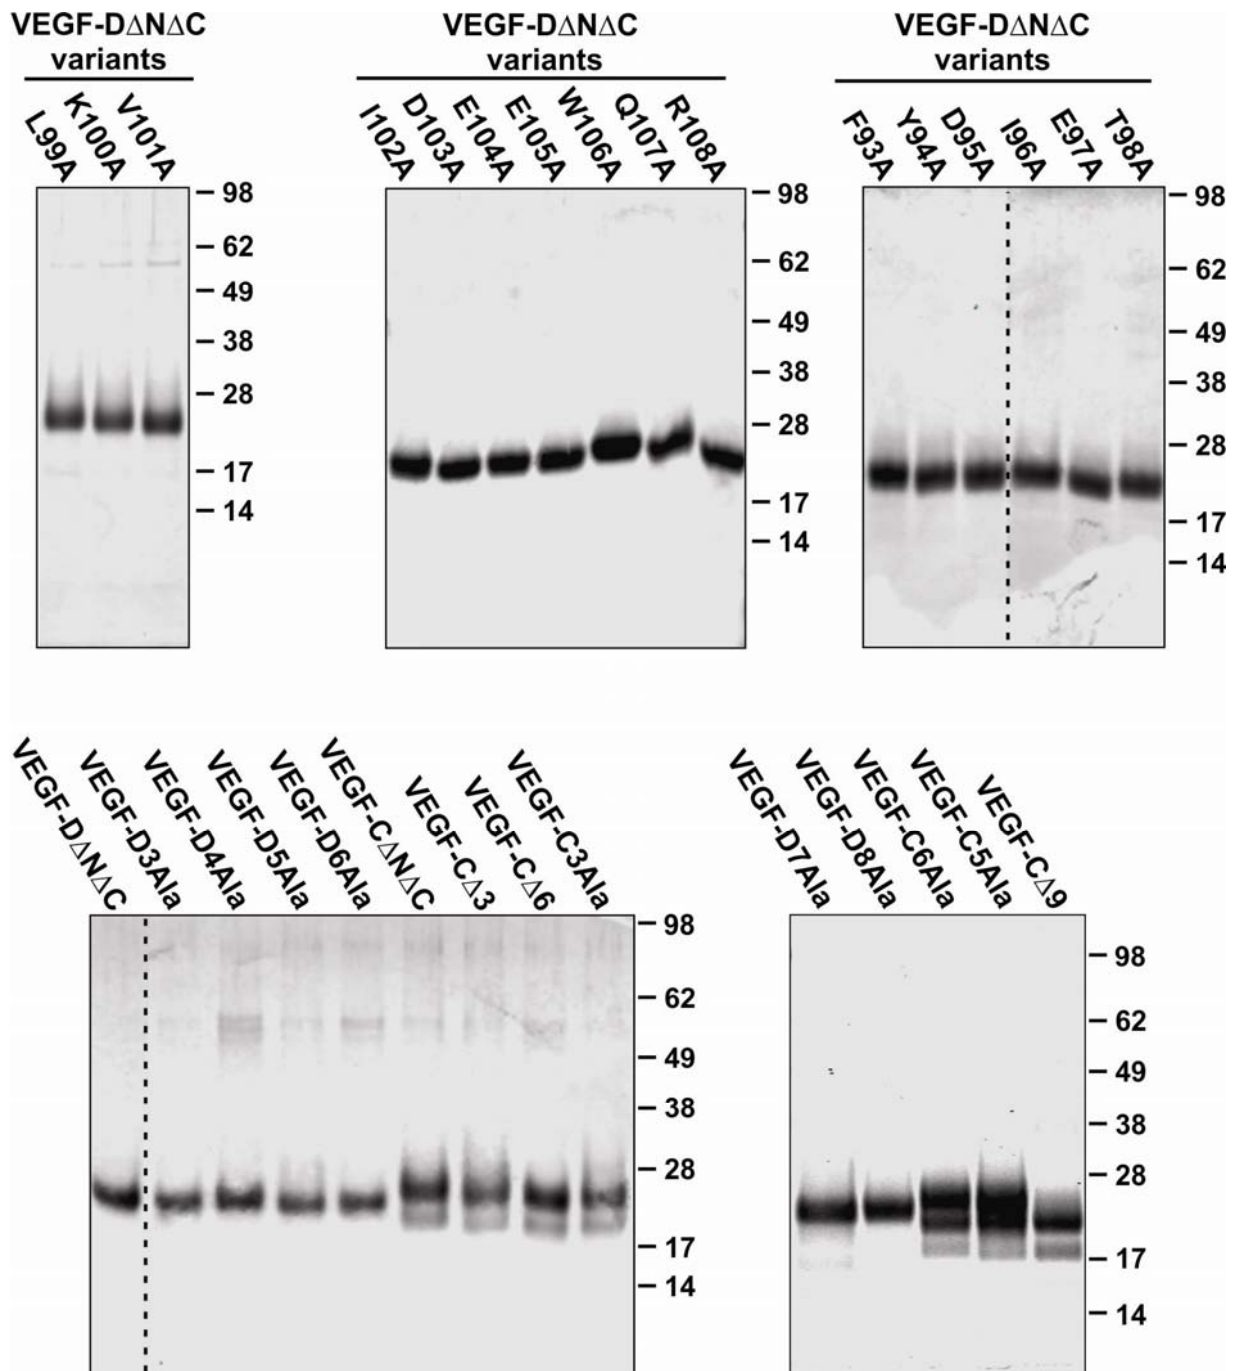

**Supplementary Figure 1. Analysis of purified variants of VEGF-D $\Delta$ N $\Delta$ C and VEGF-C $\Delta$ N $\Delta$ C used in this study by SDS-PAGE and Coomassie staining.** Proteins (approximately 1  $\mu$ g) were subjected to SDS-PAGE under reducing conditions and stained with Coomassie Brilliant Blue. The expected sizes of the subunits of VEGF-D $\Delta$ N $\Delta$ C and VEGF-C $\Delta$ N $\Delta$ C variants are ~22 and ~24 kDa, respectively. The multiple bands detected in the 18 to 24 kDa range for variants of VEGF-C $\Delta$ N $\Delta$ C are likely due to variable degrees of glycosylation. Dotted lines indicate where irrelevant tracks have been removed from the images. Molecular weight markers in kDa are shown to the right of the images.

**Supplementary Table 1.** Nucleotide sequences of primers used to generate protein variants by site-directed mutagenesis.

| Protein variant <sup>1</sup> | Primer pair sequence <sup>2</sup>                                                                                                                            |
|------------------------------|--------------------------------------------------------------------------------------------------------------------------------------------------------------|
| F93A                         | gacgacgacaagacgcgtaacgcctatgacattgaaacactaaa<br>tttagtgttcaatgcatagggcttacgctctgtcgtcgtc                                                                     |
| Y94A                         | gacgacgacaagacgcgtaattcgctgacattgaaacactaaaagttat<br>ataacttttagtgttcaatgcatagcgaaattacgctctgtcgtcgtc                                                        |
| D95A                         | cgacaagacgcgtaacttctatgccattgaaacactaaaagttataga<br>tctataacttttagtgttcaatggcatagaagttacgctctgtcgtc                                                          |
| I96A                         | cgacaagacgcgtaacttctatgacgctgaaacactaaaagttatagatgaa<br>ttcatctataacttttagtgttcagcgtcatagaagttacgctctgtcgtc                                                  |
| E97A                         | gacgcgtaacttctatgacattgcaacactaaaagttatagatgaag<br>cttcatctataacttttagtgttcaatgcatagaagttacgctc                                                              |
| T98A                         | caagacgcgtaacttctatgacattgaaacactaaaagttatagatg<br>catctataacttttagtgttcaatgcatagaagttacgctctgtc                                                             |
| L99A                         | gcgtaacttctatgacattgaaacagcaaaagttatagatgaagaatggcaa<br>ttgccattctcatctataactttgtgttcaatgcatagaagttacgc                                                      |
| K100A                        | gcgtaatttctatgacattgaaacactagcagttatagatgaagaatggcaa<br>ttgccattctcatctataactgtagtgttcaatgcatagaagttacgc                                                     |
| V101A                        | tctatgacattgaaacactaaaagctatagatgaagaatggcaagaac<br>gttctttgccattctcatctatagcttttagtgttcaatgcataga                                                           |
| I102A                        | cttctatgacattgaaacactaaaagttgcagatgaagaatggcaagaactca<br>tgagttctttgccattctcatctgcaacttttagtgttcaatgcatagaag                                                 |
| D103A                        | cattgaaacactaaaagttatagctgaaagttggcaagaactcag<br>ctgagttctttgccattctcatctataacttttagtgttcaatg                                                                |
| E104A                        | gaaacactaaaagttatagatgcaagaatggcaagaactcagtc<br>gcaactgagttctttgccattctcatctataacttttagtgttca                                                                |
| E105A                        | cactaaaagttatagatgaagcattggcaagaactcagtcag<br>ctgcaactgagttctttgccattctcatctataacttttagtgt                                                                   |
| W106A                        | attgaaacactaaaagttatagatgaagaagcgaagaactcagtcagc<br>gctgcactgagttctttgccattctcatctataacttttagtgttcaat                                                        |
| Q107A                        | aaagttatagatgaagaatggcaagaactcagtcagccctag<br>ctagggctgcactgagttctgtccattctcatctataacttt                                                                     |
| R108A                        | gttatagatgaagaatggcaagaactcagtcagccctagag<br>ctctagggctgcactgagttctgtccattctcatctataac                                                                       |
| Y94A (U)                     | gcttcaatctcgcgcgtaatttcgctgacattgaaacactaaaagttat<br>ataacttttagtgttcaatgcatagcgaaattacgctcggagattgaagc                                                      |
| K100A (U)                    | cgcgtaatttctatgacattgaaacactagcagttatagatgaagaatggcaa<br>tttgccattctcatctataactgtagtgttcaatgcatagaagttacgcg                                                  |
| I102A (U)                    | atttctatgacattgaaacactaaaagttgcagatgaagaatggcaagaactcag<br>ctgagttctttgccattctcatctgcaacttttagtgttcaatgcatagaat                                              |
| VEGF-D3Ala                   | caaggacgacgacgacaagacgcgtaacgctgcaactgaaacactaaaagttatagatgaag<br>cttcatctataacttttagtgttcaatggcagcggttacgctctgtcgtcgtcgtccttg                               |
| VEGF-D5Ala                   | caagacgcgtaatgccgctgcccgtgcaacactaaaagttatagatgaag<br>ttcatctataacttttagtgttcagcggcagcggcattacgctctgtc                                                       |
| VEGF-D6Ala                   | gacaagacgcgtaatgccgctgcccgtgcaactaaaagttatagatgaagaatg<br>cattctcatctataacttttagtgtcagcggcagcggcattacgctctgtc                                                |
| VEGF-D7Ala                   | cgctgcagcagcaaaaagttatagatgaagaatggc<br>gcagcggcattacgctc                                                                                                    |
| VEGF-D8Ala                   | tgacgacgacgagttatagatgaagaatggcaagaac<br>gcccagcggcattacgc                                                                                                   |
| VEGF-C3Ala                   | tcaaggacagaagagactataaaatttgctgcagcagctgctgctcagagatcttgaagaattgataatgagtgag<br>ctccactcattatcaatactttcaagatctctgtagcagcagctgctgcagcaaatttatagctctctgtccttga |
| VEGF-C5Ala                   | tcaatactttcaagatcgtcagcagcagctgctgcag<br>ctgcagcagctgctgctgcagcagcttgaagaattgga                                                                              |
| VEGF-C6Ala                   | tgctgcagcggccttgaagaattgga<br>gcagcgtcgtcagcaaat                                                                                                             |
| VEGF-C7Ala                   | tgacgcccgcgcaaaagttatgataatgagtgag<br>gcagcagctgctgcagca                                                                                                     |
| VEGF-C8Ala                   | tgacgcccgcgcaagttatgataatgagtgaggaagaac<br>gcagcagctgctgcagca                                                                                                |
| VEGF-CΔ3                     | actttcaagatctctgtattatgctgcagcaaatttatagctc<br>gagactataaaatttgctgcagcatataacagagatcttgaagaatg                                                               |
| VEGF-CΔ6                     | aatactttcaagatctctgtatttgctgcagcaaatttatagctc<br>gagactataaaatttgctgcagcaaatacagagatcttgaagaatg                                                              |
| VEGF-CΔ9                     | agagactataaaatttgctgcagcaacagagatcttgaagaatgga<br>tcaatactttcaagatctctgtgctgcagcaaatttatagctct                                                               |

<sup>1</sup>All proteins are tagged with the FLAG octapeptide except those indicated by "(U)" which are untagged

<sup>2</sup>For each primer pair, the first line is forward primer and the second is reverse primer
